# Supplementary material for: The S1 protein of SARS-CoV-2 crosses the blood–brain barrier in mice
Source: Springer Nature journal article supplement (doi:10.1038/s41593-020-00771-8), 2020-12-16
Supplement: 41593_2020_771_MOESM1_ESM.pdf [file 41593_2020_771_MOESM1_ESM.pdf]

---

**Supplementary information**

---

**The S1 protein of SARS-CoV-2 crosses the blood–brain barrier in mice**

---

In the format provided by the authors and unedited

Extended Data Table 1. Stability as Assessed by Acid Precipitation of I-S1 in Brain and Blood 10 and 30 min after Intravenous Injection.

|       | 10 min    | 30 min   | Processing Control |
|-------|-----------|----------|--------------------|
| Blood | 98 ± 0.8  | 72 ± 1.8 | 94 ± 0.3           |
| Brain | 77 ± 0.04 | 24 ± 5.5 | 95 ± 0.2           |

Values are mean ± SE with units of percent (see equation 3); n = 3 for 10 min and 30 min and n = 2 for Processing Control.

Extended Data Table 2. The number of mice used to calculate each regression line in figure 8 is shown here. Values in parentheses were excluded based on exclusion criteria for linear regression as described in methods.

|                | ApoE3 females | ApoE3 males | ApoE4 females | ApoE4 males |
|----------------|---------------|-------------|---------------|-------------|
| Brain (T-Alb)  | 11            | 10          | 10            | 10          |
| Serum          | 11            | 9 (1)       | 9 (1)         | 10          |
| Brain (I-S1)   | 11            | 9 (1)       | 9 (1)         | 10          |
| Olfactory bulb | 10 (1)        | 10          | 9 (1)         | 8 (2)       |
| Lung           | 11            | 9 (1)       | 8 (2)         | 10          |
| Liver          | 6 (5)         | 8 (2)       | 7 (3)         | 9 (1)       |
| Spleen         | 7 (4)         | 8 (2)       | 9 (1)         | 9 (1)       |
| Kidney         | 7 (4)         | 7 (3)       | 8 (2)         | 8 (2)       |
