# Supplementary figures and images for: The S1 protein of SARS-CoV-2 crosses the blood–brain barrier in mice
Source: Springer Nature journal article supplement (doi:10.1038/s41593-020-00771-8), 2020-12-16

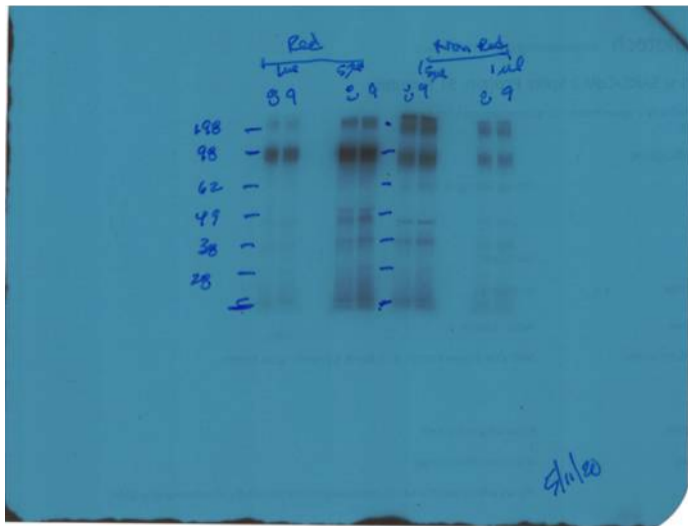

Raybiotech

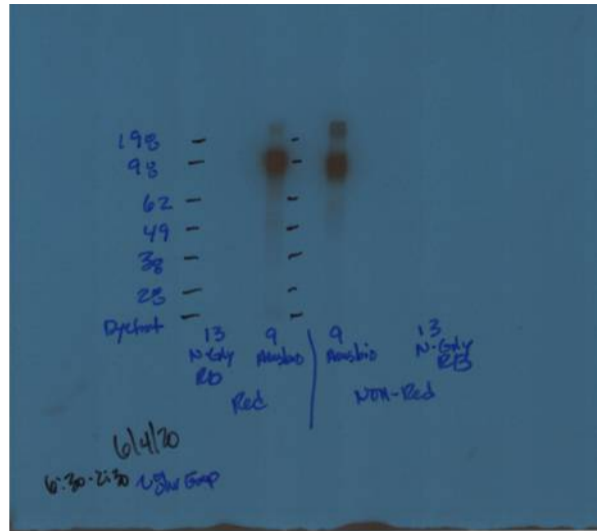

Amsbio

Supplement: 41593_2020_771_MOESM3_ESM.pdf [file 41593_2020_771_MOESM3_ESM.pdf]
